# Supplementary material
Source: MDPI journal article supplement (https://www.mdpi.com/2674-1172/1/1/5)
Supplement: s1 [file s1]

Archive with 1 entries (1 files):
- organoids-1678657-supplementary.pdf
